# Supplementary material for: The absolute configuration of heptahelicene: aVCD spectroscopy study
Source: Royal Society of Chemistry journal article supplement (doi:10.1039/b312877f), 2004-01-01
Supplement: b312877f.doc [file b312877f.doc]

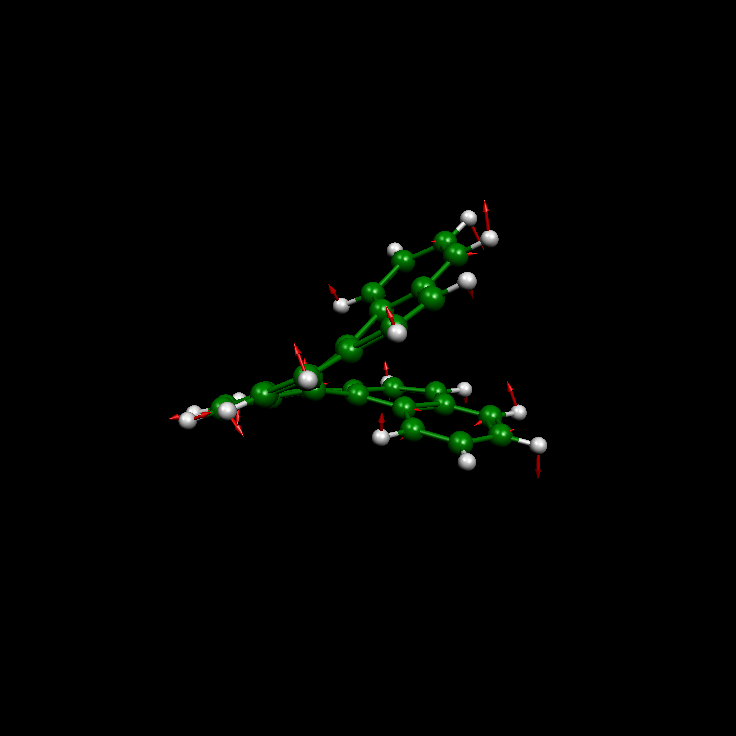


**Caption:** Normal mode of the 950 cm-1 band. Calculations were performed at the B3LYP / 6-31G(d,p) level.


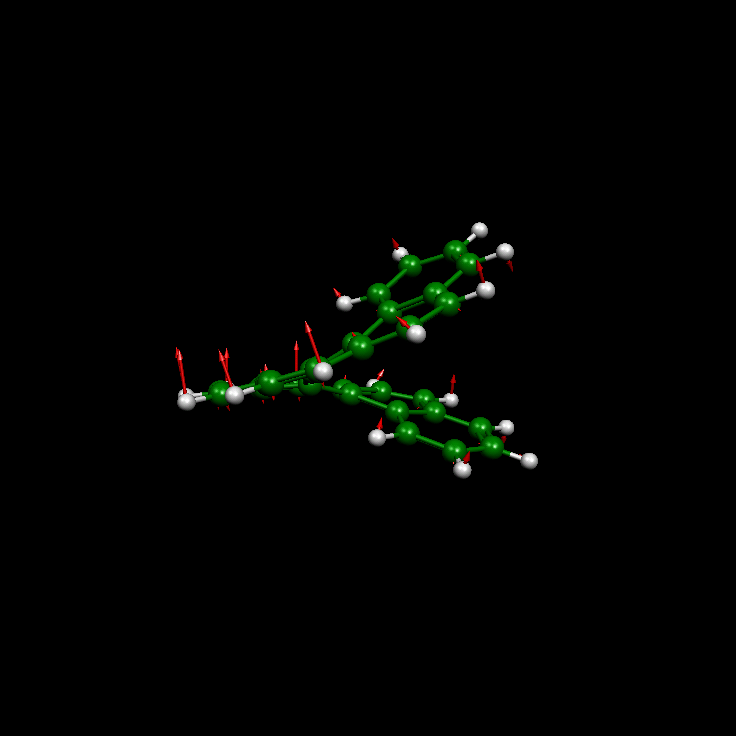


**Caption:** Normal mode (861 cm-1) with the largest calculated IR and VCD activity. Calculations were performed at the B3LYP / 6-31G(d,p) level.


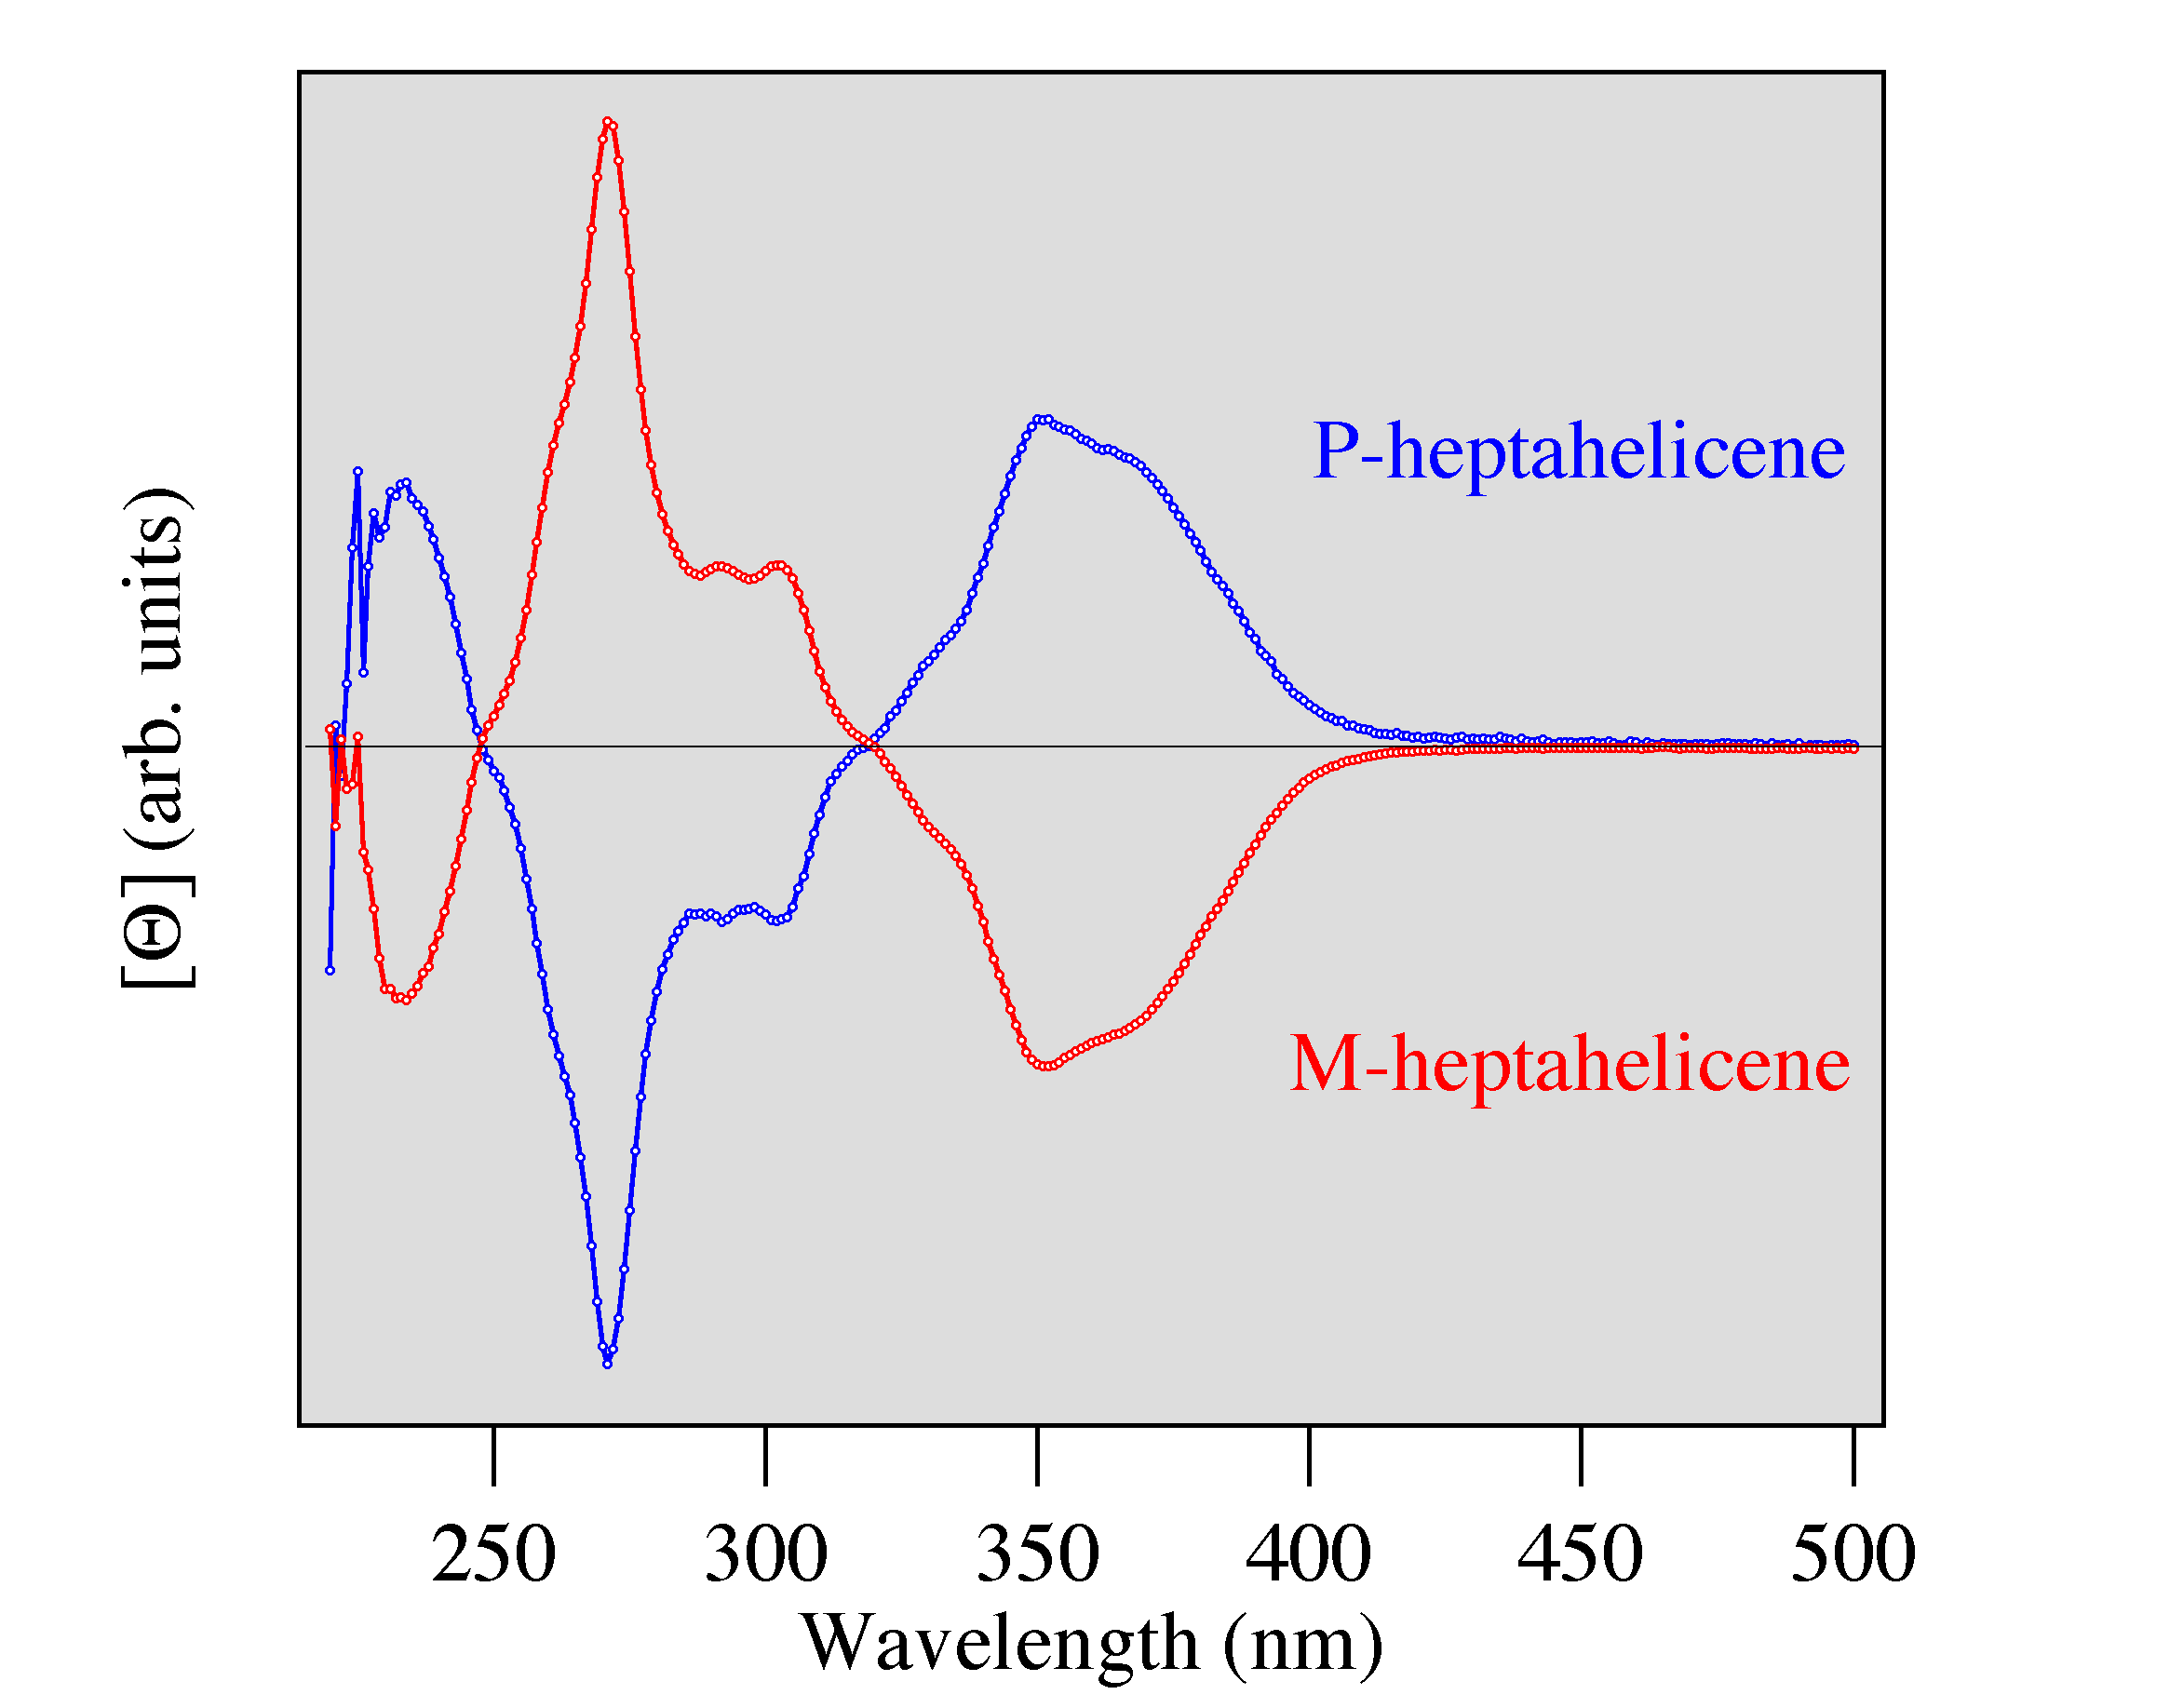


CD spectra of heptahelicene.
